# Supplementary material for: The Way of Water: Unravelling White Spot Syndrome Virus (WSSV) Transmission Dynamics in Litopenaeus vannamei Shrimp
Source: MDPI journal article supplement (doi:10.3390/v15091824), 2023-08-28
Supplement: s1 [file s1]

Supplementary Materials

# The way of water: unravelling white spot syndrome virus (WSSV) transmission dynamics in *Litopenaeus vannamei* shrimp

Natasja Cox <sup>1,2\*</sup>, Evelien De Swaef<sup>1</sup>, Mathias Corteel<sup>1</sup>, Wim Van Den Broeck<sup>4</sup>, Peter Bossier<sup>3</sup>, João J. Dantas-Lima<sup>1</sup>, and Hans J. Nauwynck<sup>2</sup>

\* Correspondence: [natasja.cox@imaqua.eu](mailto:natasja.cox@imaqua.eu) or [natasja.cox@ugent.be](mailto:natasja.cox@ugent.be) (C.N.)

**Citation:** To be added by editorial staff during production.

Academic Editor: Firstname Last-name

Received: date

Revised: date

Accepted: date

Published: date

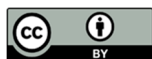

**Copyright:** © 2023 by the authors. Submitted for possible open access publication under the terms and conditions of the Creative Commons Attribution (CC BY) license (<https://creativecommons.org/licenses/by/4.0/>).

**Table S1.** Infectious titers (SID<sub>50</sub> g<sup>-1</sup>) of two solid inoculum stocks through i.m. injection of *Litopenaeus vannamei* postlarvae. The experiments were terminated when no mortalities occurred for 48 hours.

| Stock 1                     | Dilution         | N | Dead animals | Infectious titer<br>(SID <sub>50</sub> g <sup>-1</sup> ) | $\bar{x}$ infectious titer<br>(SID <sub>50</sub> g <sup>-1</sup> ) |
|-----------------------------|------------------|---|--------------|----------------------------------------------------------|--------------------------------------------------------------------|
| Replicate 1<br>(PL75, 2.4g) | 10 <sup>-3</sup> | 5 | 5/5          | 10 <sup>7.3</sup>                                        | 10 <sup>7.7</sup>                                                  |
|                             | 10 <sup>-4</sup> | 5 | 5/5          |                                                          |                                                                    |
|                             | 10 <sup>-5</sup> | 5 | 1/5          |                                                          |                                                                    |
|                             | 10 <sup>-6</sup> | 5 | 0/5          |                                                          |                                                                    |
|                             | 10 <sup>-7</sup> | 5 | 0/5          |                                                          |                                                                    |
| Replicate 2<br>(PL73, 1.5g) | 10 <sup>-3</sup> | 5 | 5/5          | 10 <sup>7.9</sup>                                        |                                                                    |
|                             | 10 <sup>-4</sup> | 5 | 5/5          |                                                          |                                                                    |
|                             | 10 <sup>-5</sup> | 5 | 3/5          |                                                          |                                                                    |
|                             | 10 <sup>-6</sup> | 5 | 0/5          |                                                          |                                                                    |
|                             | 10 <sup>-7</sup> | 5 | 0/5          |                                                          |                                                                    |
| Replicate 3<br>(PL69, 2.0g) | 10 <sup>-3</sup> | 5 | 5/5          | 10 <sup>7.9</sup>                                        |                                                                    |
|                             | 10 <sup>-4</sup> | 5 | 5/5          |                                                          |                                                                    |
|                             | 10 <sup>-5</sup> | 5 | 3/5          |                                                          |                                                                    |
|                             | 10 <sup>-6</sup> | 5 | 0/5          |                                                          |                                                                    |
|                             | 10 <sup>-7</sup> | 5 | 0/5          |                                                          |                                                                    |
| Stock 2                     | Dilution         | N | Dead animals | Infectious titer<br>(SID <sub>50</sub> g <sup>-1</sup> ) | $\bar{x}$ infectious titer<br>(SID <sub>50</sub> g <sup>-1</sup> ) |
| Replicate 1<br>(PL80, 7.1g) | 10 <sup>-3</sup> | 5 | 5/5          | 10 <sup>8.8</sup>                                        | 10 <sup>8.6</sup>                                                  |
|                             | 10 <sup>-4</sup> | 5 | 5/5          |                                                          |                                                                    |
|                             | 10 <sup>-5</sup> | 5 | 5/5          |                                                          |                                                                    |
|                             | 10 <sup>-6</sup> | 5 | 4/5          |                                                          |                                                                    |
|                             | 10 <sup>-7</sup> | 5 | 1/5          |                                                          |                                                                    |
| Replicate 2<br>(PL80, 7.1g) | 10 <sup>-3</sup> | 5 | 5/5          | 10 <sup>8.5</sup>                                        |                                                                    |
|                             | 10 <sup>-4</sup> | 5 | 5/5          |                                                          |                                                                    |
|                             | 10 <sup>-5</sup> | 5 | 5/5          |                                                          |                                                                    |
|                             | 10 <sup>-6</sup> | 5 | 3/5          |                                                          |                                                                    |
|                             | 10 <sup>-7</sup> | 5 | 0/5          |                                                          |                                                                    |
| Replicate 3<br>(PL80, 7.1g) | 10 <sup>-3</sup> | 5 | 5/5          | 10 <sup>8.5</sup>                                        |                                                                    |
|                             | 10 <sup>-4</sup> | 5 | 5/5          |                                                          |                                                                    |
|                             | 10 <sup>-5</sup> | 5 | 5/5          |                                                          |                                                                    |
|                             | 10 <sup>-6</sup> | 5 | 3/5          |                                                          |                                                                    |
|                             | 10 <sup>-7</sup> | 5 | 0/5          |                                                          |                                                                    |

**Table S2.** Concentration of *vp19* in water samples taken at 0, 24, 30, 48, 54, and 72hpi from tanks housing a *L. vannamei* shrimp suffering from WSD. Shrimp were removed from the tank shortly after their death. ND: Not detected.

| Shrimp | Onset of anorexia (hpi) | Time of death (hpi) | Sample time (hpi) | <i>vp19</i> copy number/mL |
|--------|-------------------------|---------------------|-------------------|----------------------------|
| 1      | 24                      | 54                  | 0                 | ND                         |
|        |                         |                     | 24                | ND                         |
|        |                         |                     | 30                | 8.93x10 <sup>6</sup>       |
|        |                         |                     | 48                | 1.38x10 <sup>7</sup>       |
|        |                         |                     | 54                | 2.43x10 <sup>7</sup>       |
|        |                         |                     | 72                | 7.84x10 <sup>6</sup>       |
| 2      | 24                      | 42                  | 0                 | ND                         |
|        |                         |                     | 24                | ND                         |
|        |                         |                     | 30                | 1.71x10 <sup>7</sup>       |
|        |                         |                     | 48                | 5.63x10 <sup>6</sup>       |
|        |                         |                     | 54                | ND                         |
|        |                         |                     | 72                | ND                         |
| 3      | 24                      | 48                  | 0                 | ND                         |
|        |                         |                     | 24                | ND                         |
|        |                         |                     | 30                | 1.40x10 <sup>7</sup>       |
|        |                         |                     | 48                | 2.48x10 <sup>7</sup>       |
|        |                         |                     | 54                | 4.83x10 <sup>6</sup>       |
|        |                         |                     | 72                | ND                         |
| 4      | 24                      | 42                  | 0                 | ND                         |
|        |                         |                     | 24                | 1.20x10 <sup>6</sup>       |
|        |                         |                     | 30                | 5.93x10 <sup>6</sup>       |
|        |                         |                     | 48                | 6.02x10 <sup>7</sup>       |
|        |                         |                     | 54                | 5.47x10 <sup>7</sup>       |
|        |                         |                     | 72                | 2.40x10 <sup>7</sup>       |
| 5      | 24                      | 66                  | 0                 | ND                         |
|        |                         |                     | 24                | 1.10x10 <sup>6</sup>       |
|        |                         |                     | 30                | 7.66x10 <sup>6</sup>       |
|        |                         |                     | 48                | 7.53x10 <sup>6</sup>       |
|        |                         |                     | 54                | 1.97x10 <sup>7</sup>       |
|        |                         |                     | 72                | 1.87x10 <sup>8</sup>       |
| 6      | 24                      | 42                  | 0                 | ND                         |
|        |                         |                     | 24                | ND                         |
|        |                         |                     | 30                | 2.28x10 <sup>7</sup>       |
|        |                         |                     | 48                | 1.38x10 <sup>7</sup>       |
|        |                         |                     | 54                | 2.96x10 <sup>6</sup>       |
|        |                         |                     | 72                | ND                         |
| 7      | 48                      | 60                  | 0                 | ND                         |
|        |                         |                     | 24                | 5.52x10 <sup>6</sup>       |
|        |                         |                     | 30                | ND                         |
|        |                         |                     | 48                | 1.17x10 <sup>7</sup>       |
|        |                         |                     | 54                | 1.86x10 <sup>7</sup>       |
|        |                         |                     | 72                | 4.62x10 <sup>9</sup>       |
| 8      | 24                      | 66                  | 0                 | ND                         |
|        |                         |                     | 24                | 6.16x10 <sup>6</sup>       |
|        |                         |                     | 30                | ND                         |

|    |    |    |    |                      |
|----|----|----|----|----------------------|
|    |    |    | 48 | 2.63x10 <sup>7</sup> |
|    |    |    | 54 | 7.46x10 <sup>7</sup> |
|    |    |    | 72 | 1.05x10 <sup>7</sup> |
| 9  | 48 | 66 | 0  | ND                   |
|    |    |    | 24 | ND                   |
|    |    |    | 30 | ND                   |
|    |    |    | 48 | ND                   |
|    |    |    | 54 | ND                   |
|    |    |    | 72 | 9.22x10 <sup>6</sup> |
| 10 | 24 | 48 | 0  | ND                   |
|    |    |    | 24 | ND                   |
|    |    |    | 30 | 5.26x10 <sup>6</sup> |
|    |    |    | 48 | 6.98x10 <sup>7</sup> |
|    |    |    | 54 | 1.56x10 <sup>8</sup> |
|    |    |    | 72 | 2.63x10 <sup>7</sup> |
| 11 | 24 | 42 | 0  | ND                   |
|    |    |    | 24 | 1.31x10 <sup>7</sup> |
|    |    |    | 30 | 7.04x10 <sup>6</sup> |
|    |    |    | 48 | 1.58x10 <sup>7</sup> |
|    |    |    | 54 | 1.47x10 <sup>7</sup> |
|    |    |    | 72 | ND                   |

30

31

32

33
